# Supplementary material for: Environmental application of dicarboxylated hairy cellulose crosslinked with calcium for removal and confining of Pb(ii)
Source: Royal Society of Chemistry journal article supplement (doi:10.1039/d4ew00720d), 2024-11-11
Supplement: d4ew00720d1.pdf [file d4ew00720d1.pdf]

## Supporting Information

### Environmental application of dicarboxylated hairy cellulose crosslinked with calcium for removal and confining of Pb(II)

Table S1. Box-Behnken Analysis of Variance

| Source            | DF | Adj SS  | Adj MS  | F-Value | P-Value |
|-------------------|----|---------|---------|---------|---------|
| Model             | 9  | 7283.00 | 809.22  | 14.60   | 0.000   |
| Linear            | 3  | 5199.97 | 1733.32 | 31.26   | 0.000   |
| pH                | 1  | 32.48   | 32.48   | 0.59    | 0.453   |
| Time              | 1  | 5060.07 | 5060.07 | 91.27   | 0.000   |
| mass              | 1  | 107.42  | 107.42  | 1.94    | 0.179   |
| Square            | 3  | 1451.73 | 483.91  | 8.73    | 0.001   |
| pH*pH             | 1  | 441.95  | 441.95  | 7.97    | 0.010   |
| time*time         | 1  | 1094.80 | 1094.80 | 19.75   | 0.000   |
| mass*mass         | 1  | 0.05    | 0.05    | 0.00    | 0.977   |
| 2-Way Interaction | 3  | 631.30  | 210.43  | 3.80    | 0.026   |
| pH*time           | 1  | 506.31  | 506.31  | 9.13    | 0.007   |
| pH*mass           | 1  | 18.16   | 18.16   | 0.33    | 0.574   |
| time*mass         | 1  | 106.83  | 106.83  | 1.93    | 0.180   |
| Error             | 20 | 1108.85 | 55.44   |         |         |
| Lack-of-Fit       | 3  | 698.55  | 232.85  | 9.65    | 0.001   |
| Pure Error        | 17 | 410.30  | 24.14   |         |         |
| Total             | 29 | 8391.86 |         |         |         |

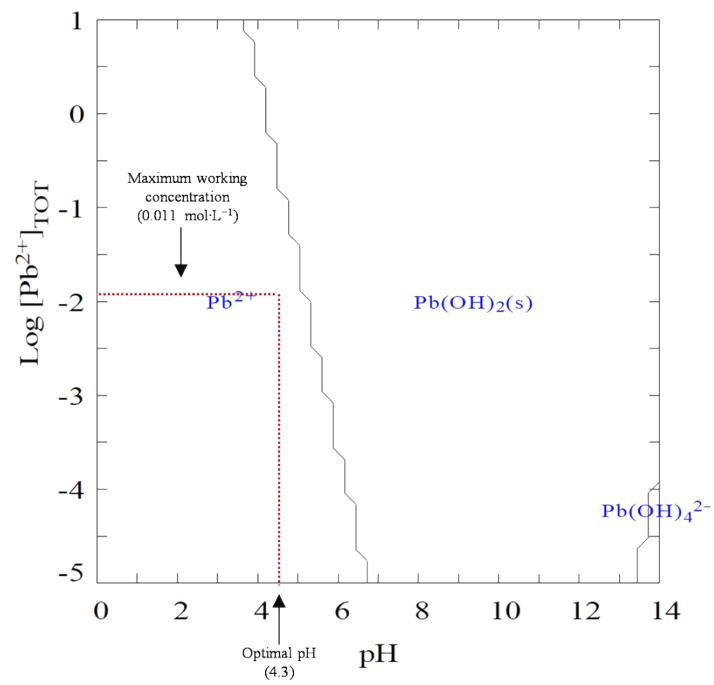

**Fig. S1** Predominance diagram for lead<sup>[1]</sup>

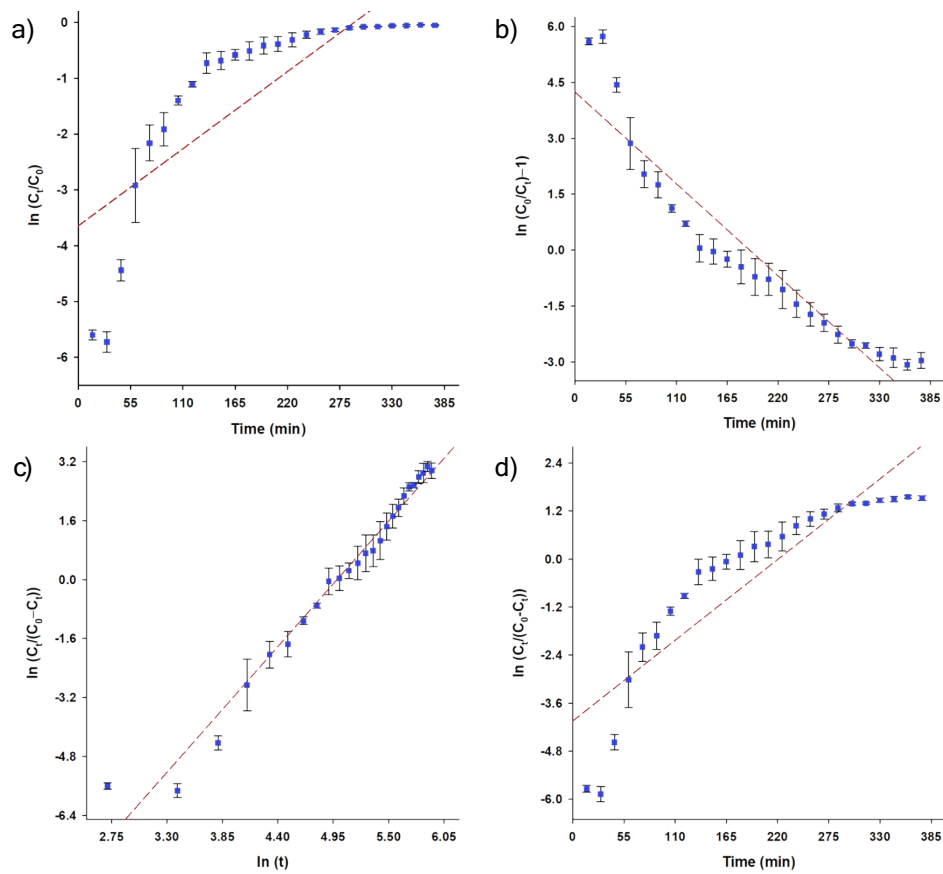

**Fig. S2** Model fitting curves for Pb(II) sorption with DCCa for a) Adams-Bohart, b) Thomas, c) Yan y d) Yoon-Nelson.

## References

- [1] I. Puigdomènech, Make equilibrium diagrams using sophisticated algorithms (MEDUSA), Software para Windows, Stockholm, 2010, versión 16 Dec 2010.
